# Supplementary material for: Rapid interpretation of small-angle X-ray scattering data
Source: PLOS journal article supplement (doi:10.1371/journal.pcbi.1006900), 2019-03-22
Supplement: S3 (10.1371/journal.pcbi.1006900.s003) [file journal.pcbi.1006900.s003]

### **S3 Appendix Modeling noise in the target scattering data.**

To assess the method’s robustness towards errors in the scattering data, we conducted a structure-based LAO holo-to-apo refinement towards theoretical difference data with artificial noise. Absolute reference and target intensities were blurred according to Gaussian distributions with mean  $\mu^q$  and standard deviation  $\sigma^q$ . For each  $q$  point, mean and standard deviation were modeled as the related clean intensity value  $\mu^q = I(q)$  and its square root  $\sigma^q = 50 \cdot \sqrt{I(q)}$ , respectively. We calculated noisy difference data by subtracting the blurred reference intensity from the blurred target intensity (see Fig 10).
